# Supplementary material for: Photocatalytic detoxification of a sulfur mustard simulant using donor-enhanced porphyrin-based covalent-organic frameworks
Source: Royal Society of Chemistry journal article supplement (doi:10.1039/d4nr05302h), 2025-01-01
Supplement: d4nr05302h1.pdf [file d4nr05302h1.pdf]

## Supporting Information

### Photocatalytic detoxification of a sulfur mustard simulant by donor-enhanced porphyrin-based Covalent-Organic Frameworks

Yana Chen<sup>a,d</sup>, Zewen Shen<sup>a</sup>, Yezi Hu<sup>a</sup>, Haotian Zhang<sup>a</sup>, Lisha Yin<sup>b</sup>, Guixia Zhao<sup>\*a</sup>, Guangtong Hai<sup>\*c</sup> and Xiubing Huang<sup>\*d</sup>

<sup>a</sup> College of Environmental Science and Engineering, North China Electric Power University, Beijing 102206, P. R. China

<sup>b</sup> Institute of Advanced Materials (IAM), School of Flexible Electronics (Future Technologies), Nanjing Tech University (Nanjing Tech), Nanjing, 211816, P. R. China

<sup>c</sup> Institute of Zhejiang University-Quzhou, Zhejiang University, Quzhou 324000, China

<sup>d</sup> Beijing Advanced Innovation Center for Materials Genome Engineering, Beijing Key Laboratory of Function Materials for Molecule & Structure Construction, School of Materials Science and Engineering, University of Science and Technology Beijing, Beijing 100083, P. R. China

\*Corresponding authors

*E-mail address:* guixiazhao@ncepu.edu.cn (G. Zhao), haigt@zju.edu.cn (G. Hai), xiubinghuang@ustb.edu.cn (X. Huang)

## 1. General information

All reagents were purchased from commercial suppliers and used without further purification unless stated otherwise. 5,10,15,20-tet-rakis-(4-aminophenyl)-porphyrin (TPH, 98%), 2,5-dihydroxyterephthalaldehyde (DHA, 98%) and 2,5-dimethoxyterephthalaldehyde (DMA, 98 %) were purchased from Jilin Chinese Academy of Sciences-Yanshen Technology Co., Ltd. Terephthalaldehyde (DA, 97 %), mesitylene (98 %), 1,4-Dioxane (99.5 %), acetic acid (AcOH,  $\geq 99.8$  %), ethanol absolute (99.5 %, Water  $\leq 300$  ppm), methanol (99.9%, GC), dimethyl sulfoxide (DMSO, 99.8%), acetonitrile (99.9%), isopropanol (99.9%), 2-Chloroethyl ethyl sulfide ( $\geq 97\%$ ), 1-Chloro-2-(ethylsulfinyl) ethane ( $\geq 97\%$ ) and Tetrahydrofuran (THF, 99 %, AR) were all provided by Aladdin.

### 1.1 Characterizations

Powder X-ray diffraction (PXRD) analyses were performed using a Rigaku SmartLab SE X-ray diffractometer equipped with a Cu K $\alpha$  source. Small angle X-ray scattering data collected on a Bruker D8 Advance diffractometer was used to correct the deviation with a step size of 0.01°. Fourier transform infrared spectra (FT-IR) were recorded on a SHIMADZU IRTracer-100. BET surface areas were obtained from N<sub>2</sub> adsorption/desorption isotherms collected at 77 K using Micromeritics TriStar II. Scanning electron microscopy (SEM) images were recorded on a Hitachi SU 8100 Scanning Electron Microscope. Solid-state <sup>13</sup>C CP/MAS NMR spectra were collected on a BRUKER AVANCE NEO 400WB spectrometer. X-ray photoelectron spectroscopy (XPS) analyses were performed using a Thermo Scientific ESCALAB 250Xi spectrometer, equipped with a monochromatic Al K $\alpha$  X-ray source (1486.8 eV). Photoelectrochemical experiments measurements were performed on an electrochemical workstation (CHI760E, CHI Instruments, Shanghai, China). Electron paramagnetic resonance (EPR) spectra were recorded at 293 K with a Bruker EMXnano259 spectrometer, operated at 9.62 GHz with 12.59 mW power and modulation at 100 kHz/1 G. By using BaSO<sub>4</sub> as a reflectance standard, the UV-vis DRS of COFs was estimated from 300 to 800 nm by an UV-3600 UV-vis spectrophotometer (Shimadzu, Japan) configured with a diffuse reflectance measurement accessory. Thermogravimetric analysis (TGA) spectra were recorded using a TG/DTA 8122 thermogravimeter under an N<sub>2</sub> atmosphere, with a heating rate of 10 °C min<sup>-1</sup> from 30 °C to 800 °C. Photoluminescence (PL) spectra were collected on steady-state fluorescence spectrometer (Horiba Fluoromax-4 spectrophotometer). The conversion, selectivity of CEES was monitored by using a Shimadzu GC-MS (GCMS-QP2020 NX) instrument equipped with a Dielectric barrier discharge plasma detector and

a Zebron ZB-Wax column.

## 1.2 Electrochemical measurements

The Mott-Schottky plots, photocurrent response and electrochemical impedance of the photo-catalysts were measured on an electrochemical workstation (CHI760E, CHI Instruments, Shanghai, China). A white LED (PLS-LED 100C, PerfectLight) was utilized as the light source and 0.5 M Na<sub>2</sub>SO<sub>4</sub> aqueous solution was used as the supporting electrolyte throughout the photocurrent measurements. A platinum wire and Ag/AgCl electrode were used as counter electrode and reference electrode, respectively. To prepare the working electrode, 50 μL naphthol together with 1 mL ethanol was mixed with 2 mg catalyst. 50 μL of the mixture was then dipped into ITO, followed by drying in air. Photocurrent measurements were conducted with light on–off cycles and a scan rate of 100 mV s<sup>-1</sup>. Mott–Schottky measurements were performed under dark conditions at frequencies of 500 Hz, 1000Hz and 1500 Hz. Furthermore, electrochemical impedance spectroscopy (EIS) was conducted under light irradiation at a bias potential of +0.5 V. The potential vs NHE was calculated by using the following Eq:

$$E_{\text{NHE}} = E_{\text{Ag/AgCl}} + 0.197$$

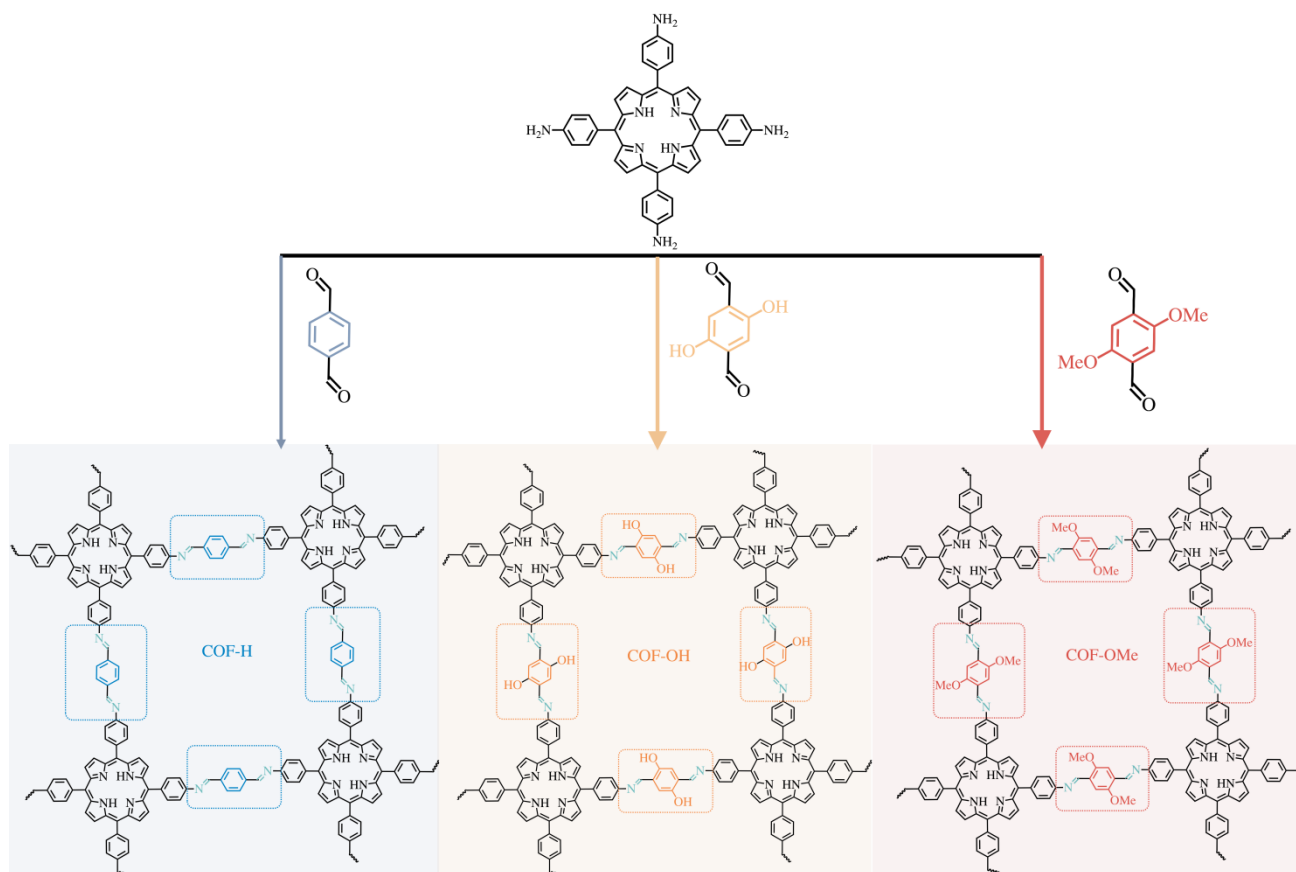

**Fig. S1.** The schematic diagram for synthesis and structures of COF-H, COF-OH and COF-OMe.

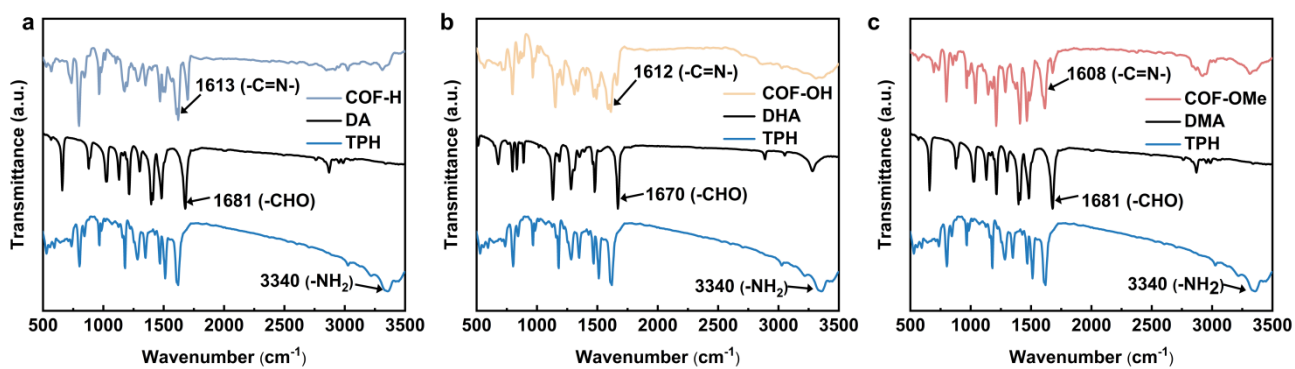

**Fig. S2.** Fourier transform infrared spectra (FT-IR) of (a) COF-H, (b) COF-OH and (c) COF-OMe.

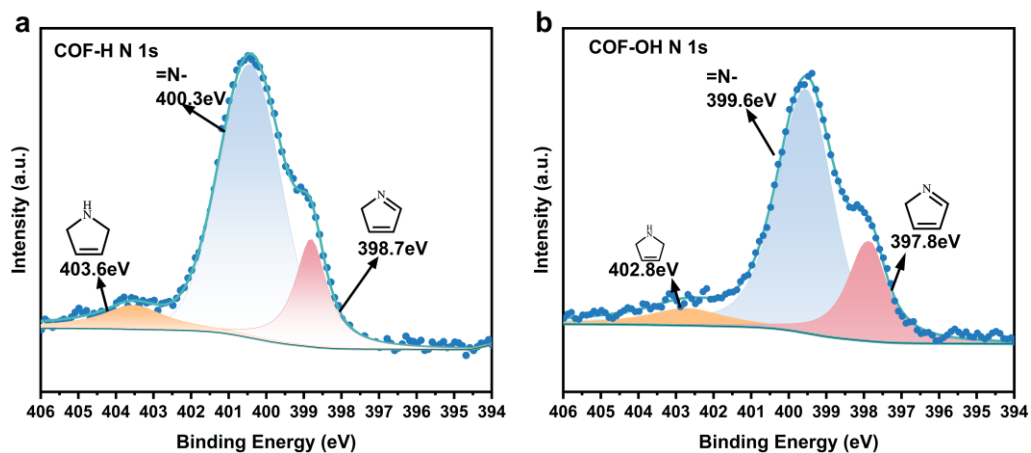

**Fig. S3.** N 1s XPS spectra of (a) COF-H and (b) COF-OH.

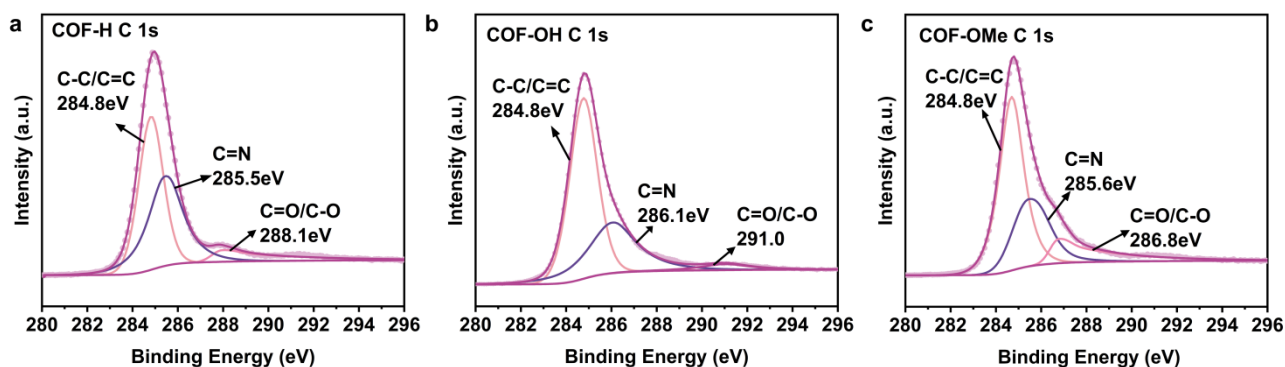

**Fig. S4.** C 1s XPS spectra of (a) COF-H, (b) COF-OH and (c) COF-OMe.

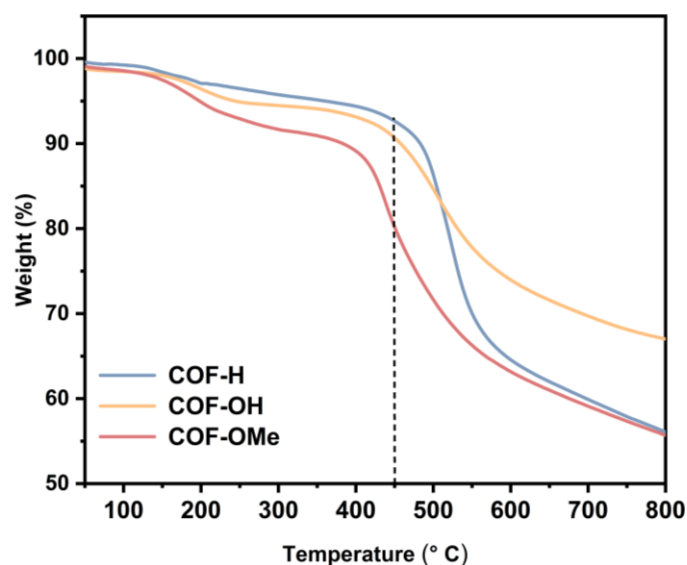

**Fig. S5.** Thermal gravimetric analysis spectrum of COF-H, COF-OH and COF-OMe.

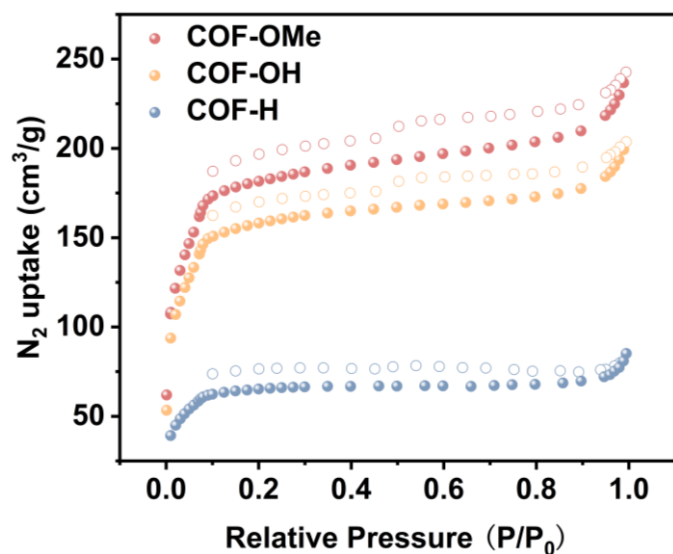

**Fig. S6.** N<sub>2</sub> sorption isotherms of COF-H, COF-OH and COF-OMe.

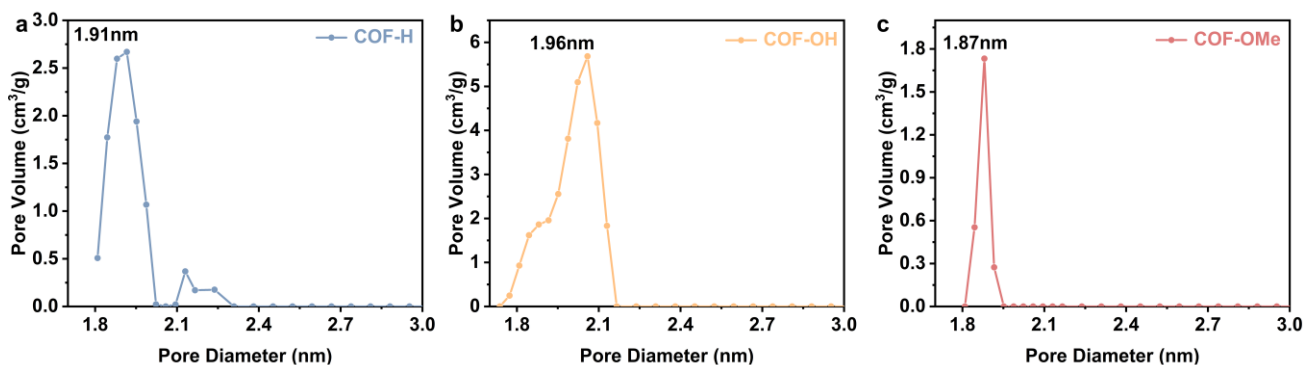

**Fig. S7.** Pore size distribution of (a) COF-H, (b) COF-OH and (c) COF-OMe.

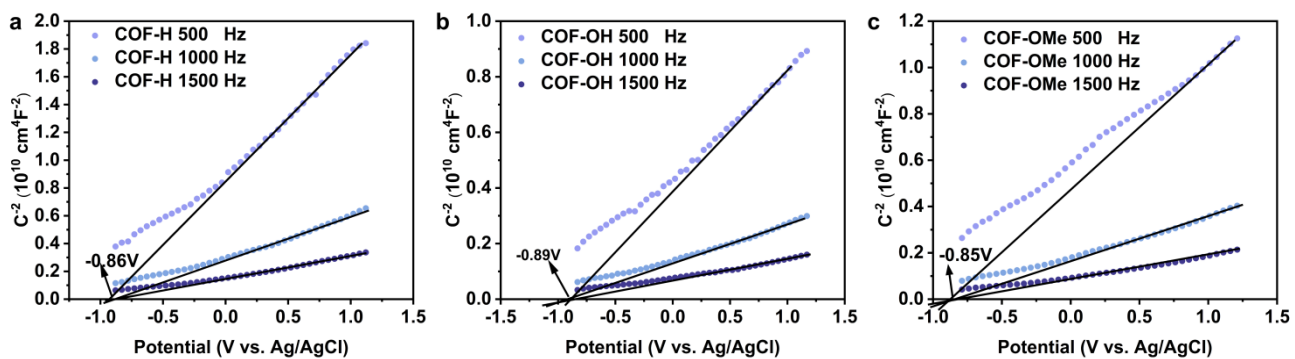

**Fig. S8.** Mott-Schottky plots of (a) COF-H, (b) COF-OH and (c) COF-OMe at 500 Hz, 1000 Hz and 1500 Hz.

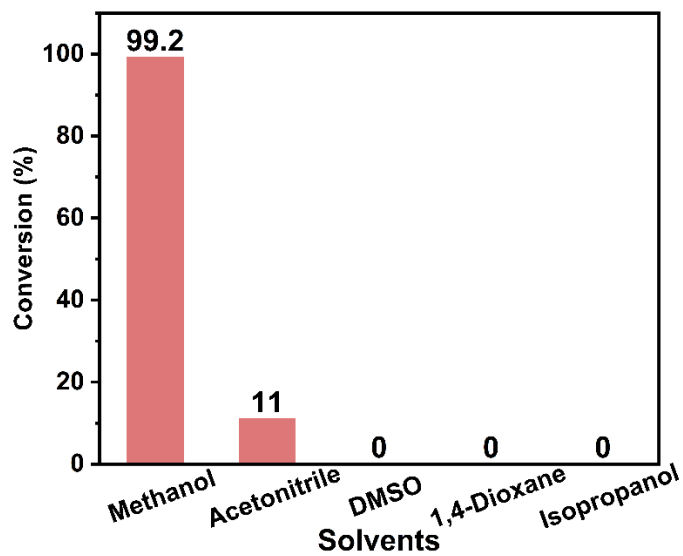

**Fig. S9.** COF-OMe photocatalyst for selective photocatalytic detoxification of CEES in different solvents. Standard conditions: COFs (5 mg), solvents (5 mL), CEES (0.2 mmol), air, white LED. Reaction time: 3h.

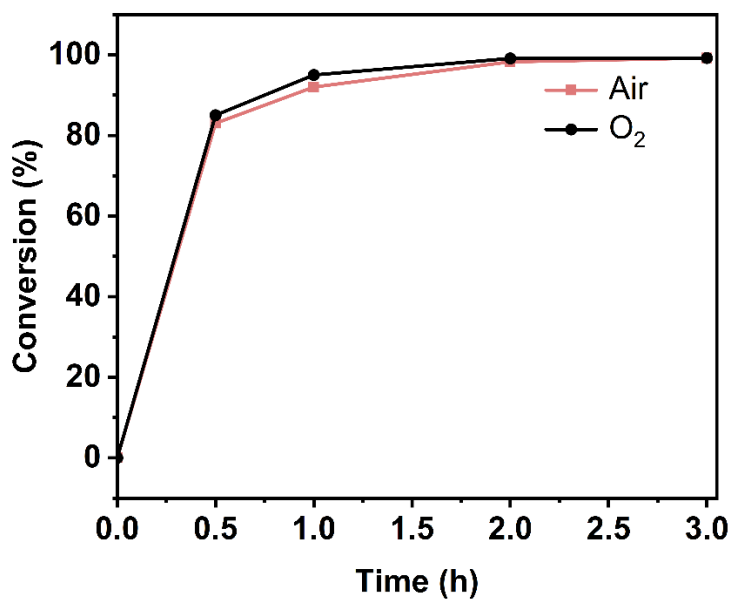

**Fig. S10.** COF-OMe photocatalyst for selective photocatalytic detoxification of CEES in air and oxygen environments. Standard conditions: COFs (5 mg), CH<sub>3</sub>OH (5 mL), CEES (0.2 mmol), white LED. Reaction time: 3h.

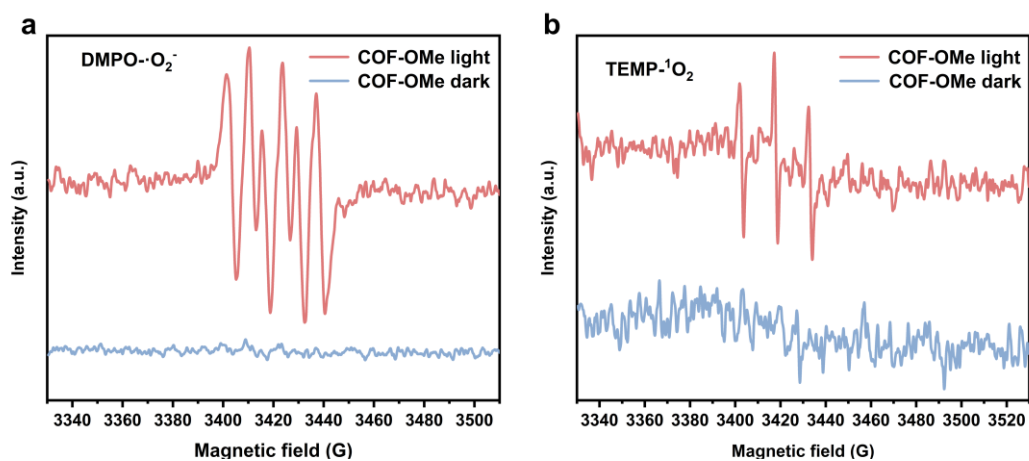

**Fig. S11.** EPR spectra obtained over COF-OMe under white LEDs irradiation and dark condition.

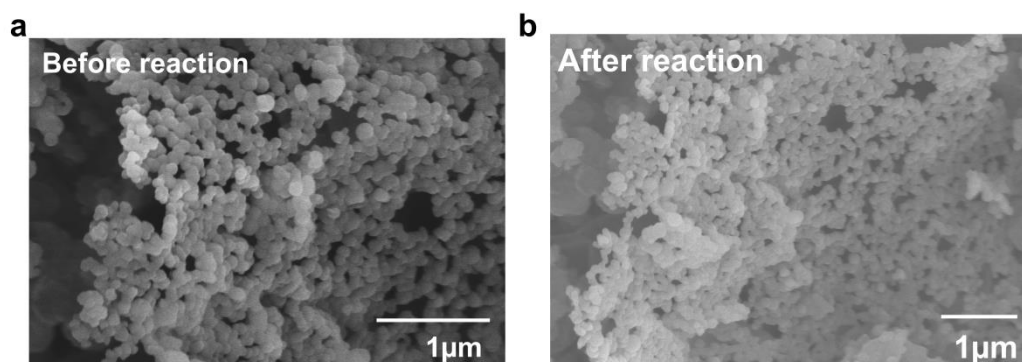

**Fig. S12.** SEM spectra of COF-OMe before and after reaction.

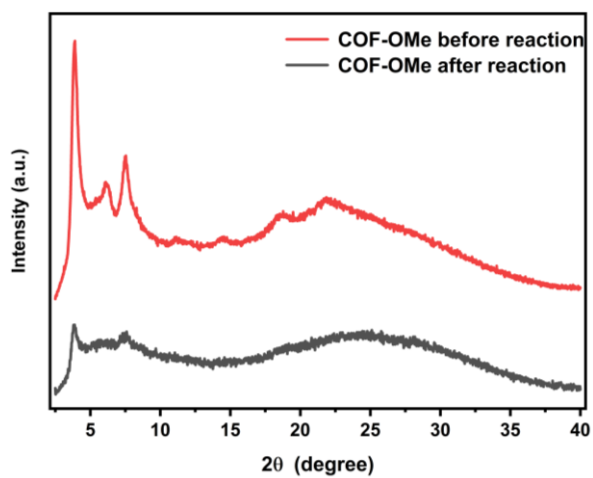

**Fig. S13.** PXRD characterization of COF-OMe before and after reaction.



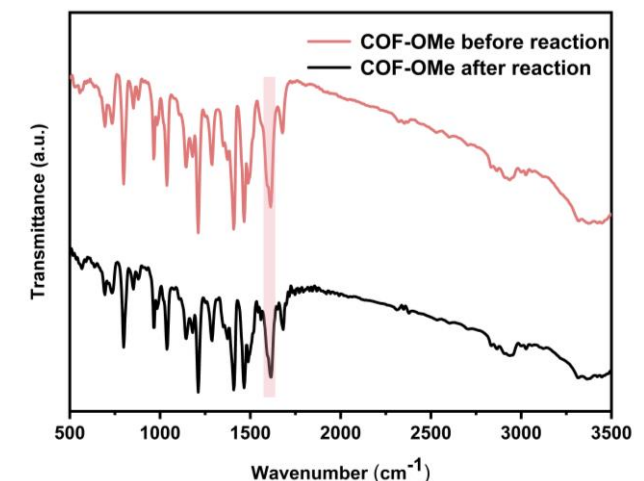

**Fig. S14.** FT-IR spectra of COF-OMe before and after reaction.

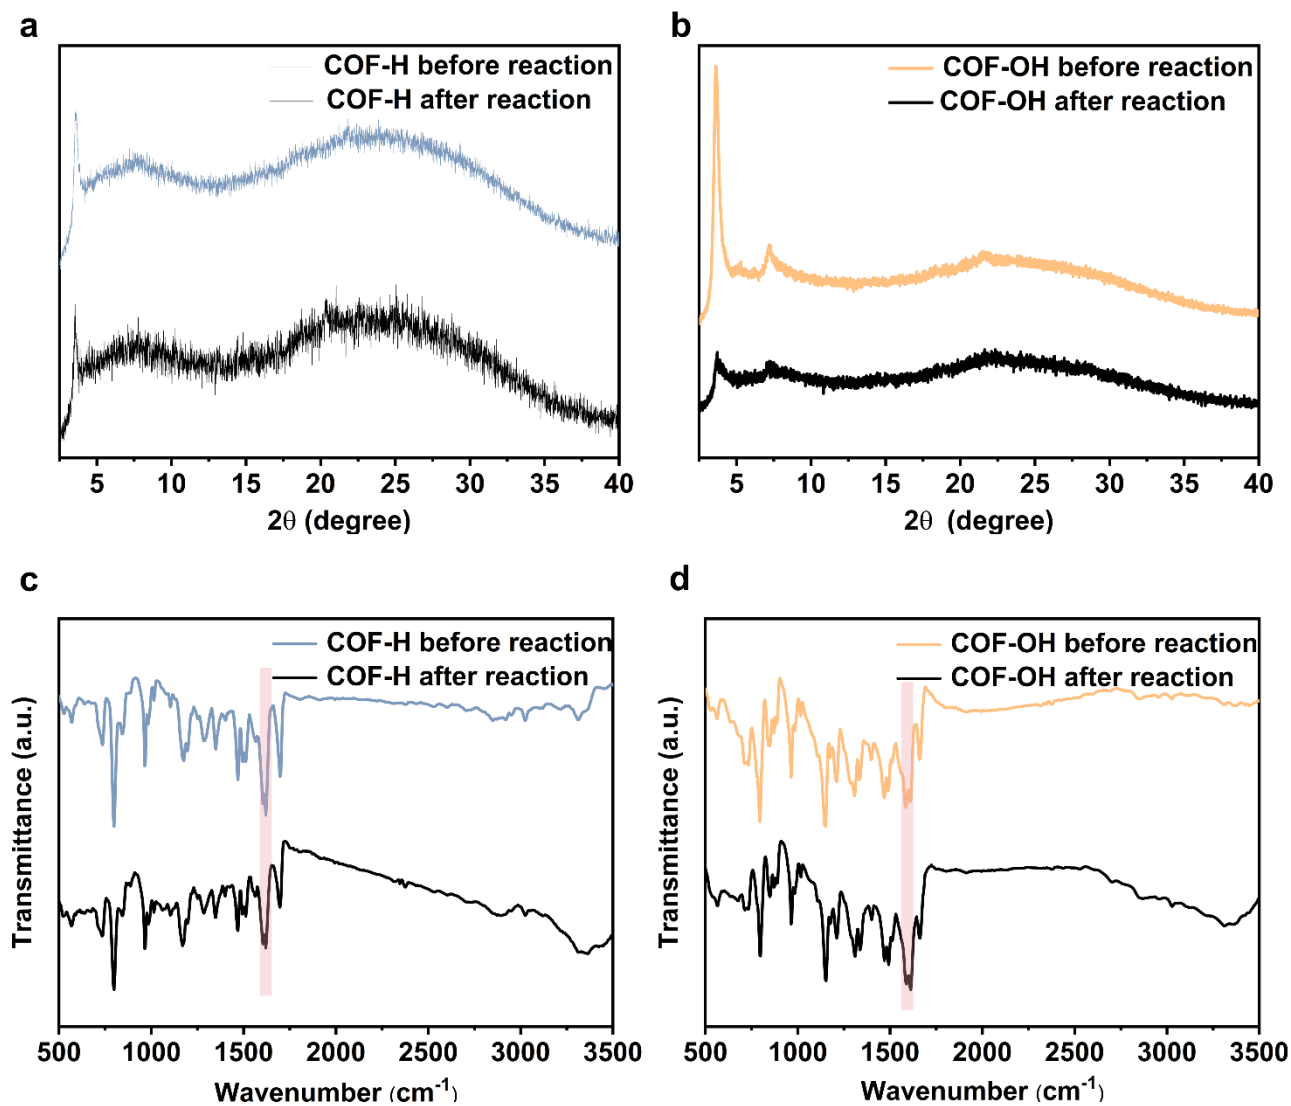

**Fig. S15.** PXRD characterization COF-H (a) and COF-OH (b); FT-IR spectra of COF-H (c) and COF-OH (d) before and after reaction.

**Table S1.** The BET surface areas and pore size of COF-H, COF-OH and COF-OMe.

| COFs materials | The BET surface areas (m <sup>2</sup> /g) | Pore size (nm) |
|----------------|-------------------------------------------|----------------|
| COF-H          | 211.4                                     | 1.91           |
| COF-OH         | 515.8                                     | 1.96           |
| COF-OMe        | 592.3                                     | 1.87           |

**Table S2.** Performance of CEES photocatalytic oxidation using various porous materials.

| Photocatalysts                          | Solvent    | Atmosphere     | light                        | Conversion                 | Ref.      |
|-----------------------------------------|------------|----------------|------------------------------|----------------------------|-----------|
| NU-400                                  | methanol   | O <sub>2</sub> | Ultraviolet light            | t <sub>1/2</sub> =10.2 min | 1         |
| NU-1000                                 | methanol   | O <sub>2</sub> | Ultraviolet light            | t <sub>1/2</sub> =6.2 min  | 2         |
| In <sub>2</sub> S <sub>3</sub> /NU-1000 | methanol   | O <sub>2</sub> | Simulated sunlight           | 3h, 90%                    | 3         |
| NU-1000-PCBA                            | methanol   | O <sub>2</sub> | UV (450nm)                   | t <sub>1/2</sub> = 3.5 min | 4         |
| Br-BDP@NU-1000                          | methanol   | O <sub>2</sub> | green light (325nm)          | t <sub>1/2</sub> = 2.5 min | 5         |
| Ag <sub>12</sub> TpyP                   | Ethanol    | O <sub>2</sub> | White light (80nm)           | t <sub>1/2</sub> = 1.5 min | 6         |
| PCN-222                                 | Methanol   | O <sub>2</sub> | Blue light                   | t <sub>1/2</sub> =13min    | 7         |
| TBPc-ExBox•PSS                          | methanol   | O <sub>2</sub> | UV (500nm)                   | t <sub>1/2</sub> =5min     | 8         |
| I-BDP-POP                               | MeOH       | O <sub>2</sub> | green LED (450nm)            | t <sub>1/2</sub> =3min     | 9         |
| Fe-TCPP-La                              | Methanol   | O <sub>2</sub> | blue LED                     | t <sub>1/2</sub> =2.5min   | 10        |
| CzBSe-CMP                               | methanol   | O <sub>2</sub> | Blue LED lamp (30 W, 460 nm) | 1h, 99%                    | 11        |
| MOF/BA/textile                          | No solvent | Air            | Simulated sunlight           | t <sub>1/2</sub> =17.6 min | 12        |
| Ag@TAPP-TFPT                            | Methanol   | O <sub>2</sub> | Xe light                     | t <sub>1/2</sub> =6.5 min  | 13        |
| TiO <sub>2</sub> /PMA SNBs              | methanol   | Air            | xenon lamp                   | 20min, 98.29%              | 14        |
| PCN-224@TiO <sub>2</sub>                | DMF        | Air            | Simulated sunlight           | t <sub>1/2</sub> =330 min  | 15        |
| COF-OMe                                 | Methanol   | Air            | white LED                    | 2h,99%                     | this work |

**Table S3.** The material cost and operation cost of different COFs for CEES photocatalytic oxidation.

| Materials      | Material Cost (\$/g) | Operation Cost (\$/g)                                     | Ref       |
|----------------|----------------------|-----------------------------------------------------------|-----------|
| BTT-TPh-O-COF  | 228.2                | CD <sub>3</sub> OD (5g/64.4), O <sub>2</sub> (1atm/0.424) | 16        |
| Por-Aminal-COF | 698.8                | CD <sub>3</sub> OD (5g/64.4), O <sub>2</sub> (1atm/0.424) | 17        |
| PW12-Ag@COF    | 97.9                 | CD <sub>3</sub> OD (5g/64.4), O <sub>2</sub> (1atm/0.424) | 18        |
| Ag@TAPP-TFPT   | 127.2                | CD <sub>3</sub> OD (5g/64.4), O <sub>2</sub> (1atm/0.424) | 13        |
| COF-H          | 39.1                 | Methanol (5g/0.07) Air (0)                                | this work |
| COF-OH         | 58.2                 | Methanol (5g/0.07) Air (0)                                | this work |
| COF-OMe        | 53.8                 | Methanol (5g/0.07) Air (0)                                | this work |

## References

1. G. Ayoub, M. Arhangel'skis, X. Zhang, F. Son, T. Islamoglu, T. Frišćić and O. K. Farha, *Beilstein Journal of Nanotechnology*, 2019, **10**, 2422-2427.
2. Y. Liu, C. T. Buru, A. J. Howarth, J. J. Mahle, J. H. Buchanan, J. B. DeCoste, J. T. Hupp and O. K. Farha, *Journal of Materials Chemistry A*, 2016, **4**, 13809-13813.
3. L. Wang, D. Shen, H. Zhang, B. Mo, J. Wu and H. Hou, *Chemistry–A European Journal*, 2022, **28**, e202103466.
4. A. J. Howarth, C. T. Buru, Y. Liu, A. M. Ploskonka, K. J. Hartlieb, M. McEntee, J. J. Mahle, J. H. Buchanan, E. M. Durke and S. S. Al-Juaid, *Chemistry–A European Journal*, 2017, **23**, 214-218.
5. A. Atilgan, T. Islamoglu, A. J. Howarth, J. T. Hupp and O. K. Farha, *ACS applied materials & interfaces*, 2017, **9**, 24555-24560.
6. M. Cao, R. Pang, Q.-Y. Wang, Z. Han, Z.-Y. Wang, X.-Y. Dong, S.-F. Li, S.-Q. Zang and T. C. Mak, *Journal of the American Chemical Society*, 2019, **141**, 14505-14509.
7. Y. Liu, A. J. Howarth, J. T. Hupp and O. K. Farha, *Angewandte Chemie*, 2015, **127**, 9129-9133.
8. Y. Beldjoudi, A. Atilgan, J. A. Weber, I. Roy, R. M. Young, J. Yu, P. Deria, A. E. Enciso, M. R. Wasielewski and J. T. Hupp, *Advanced Materials*, 2020, **32**, 2001592.
9. A. Atilgan, M. M. Cetin, J. Yu, Y. Beldjoudi, J. Liu, C. L. Stern, F. M. Cetin, T. Islamoglu, O. K. Farha and P. Deria, *Journal of the American Chemical Society*, 2020, **142**, 18554-18564.
10. Z.-H. Long, D. Luo, K. Wu, Z.-Y. Chen, M.-M. Wu, X.-P. Zhou and D. Li, *ACS Applied Materials & Interfaces*, 2021, **13**, 37102-37110.
11. Y. Zhi, Z. Yao, W. Jiang, H. Xia, Z. Shi, Y. Mu and X. Liu, *ACS applied materials & interfaces*, 2019, **11**, 37578-37585.
12. Y. Hao, E. K. Papazyan, Y. Ba and Y. Liu, *ACS Catalysis*, 2021, **12**, 363-371.
13. L. Zhang, C. Sun, S.-J. Xiao, Q.-G. Tan, G.-P. Yang, J.-Q. Fan, Y.-T. Luo, R.-P. Liang and J.-D. Qiu, *ACS Applied Nano Materials*, 2023, **6**, 17083-17091.
14. Y. T. Wang, G. H. Chen, Q. Wang, H. Zang, Q. Wang, Y. F. Li, H. Y. Zou, L. Zhan, J. W. Xie and C. Z. Huang, *Small*, 2024, 2407980.
15. X. Hu, Y. Yang, N. Li, C. Huang, Y. Zhou, L. Zhang, Y. Zhong, Y. Liu and Y. Wang, *Journal of Colloid and Interface Science*, 2024, **674**, 791-804.
16. S. Li, L. Dai, L. Li, A. Dong, J. Li, X. Meng, B. Wang and P. Li, *Journal of Materials Chemistry A*, 2022, **10**, 13325-13332.
17. Q. Y. Wang, J. Liu, M. Cao, J. H. Hu, R. Pang, S. Wang, M. Asad, Y. L. Wei and S. Q. Zang, *Angewandte Chemie*, 2022, **134**, e202207130.
18. Q. Zhu, H. An, T. Xu, S. Chang, Y. Chen, H. Luo and Y. Huang, *Applied Catalysis A: General*, 2023, **662**, 119283.
